# Supplementary material for: Observation-based assessment of stratospheric fractional release, lifetimes, and ozone depletion potentials of ten important source gases
Source: Copernicus journal article supplement (doi:10.5194/acp-13-2779-2013), 2013-03-08
Supplement: Supplementary file 1 [file acp-2012-791-su.xls]

## Sheet: Sheet1
Overview of air sampling locations and trace gas mixing ratios reported in Laube et al., 2013:" Observation-based assessment of stratospheric fractional release, lifetimes, and Ozone Depletion Potentials of ten important source gases"
E - excluded data, see manuscript for details
Sample	Pressure	Latitude	Longitude	Altitude	CFC-11	CFC-113	CFC-12	HCFC-141b	HCFC-142b	HCFC-22	H-1301	H-1211	CCl4	CH3CCl3	SF6
2009-11-01	[hPa]	[°]	[°]	[m]	[ppt]	[ppt]	[ppt]	[ppt]	[ppt]	[ppt]	[ppt]	[ppt]	[ppt]	[ppt]	[ppt]
F1-0	146.35	48.3404	10.2385	13972.5	240.862	75.7226	532.668	21.1319	19.6797	203.829	3.10543	4.14553	86.8949	8.3092	6.84816
F1-1	90.7	48.2892	10.5779	16851.5	193.82	66.8914	474.475	17.4148	17.2187	178.56	2.59649	2.82528	E	6.92877	6.29081
F1-2	74.65	48.9718	9.99575	18044.5	184.531	65.9582	464.769	16.9064	16.7796	175.812	2.51101	2.50692	E	6.80872	6.23291
F1-3	74.85	49.8349	10.4568	18020.5	167.316	61.7281	443.022	15.733	16.2985	170.617	2.33558	2.19152	57.4012	6.09484	6.1326
F1-4	74.8	50.6868	10.93	18012.5	165.662	61.537	445.748	15.2358	16.3284	170.415	2.29689	2.13052	56.2452	6.06189	6.17685
F1-5	75.05	51.5399	11.4566	17990	178.323	64.3673	461.444	16.5611	16.9364	174.378	2.47975	2.41713	61.0092	6.51719	6.18983
F1-6	69.1	51.7559	12.0209	18500	144.31	57.3221	420.728	14.1894	15.5964	163.813	2.08308	1.70467	47.8581	5.31553	5.95912
F1-7	68.15	50.7497	11.6317	18604.5	135.269	56.3811	406.766	13.6878	15.2651	160.525	1.9678	1.52189	40.8127	5.03778	5.91915
F1-8	68	49.7707	11.2786	18628	152.682	59.1482	427.523	14.8695	16.0774	166.537	2.1813	1.83084	51.7038	5.5377	5.95317
F1-9	67.7	48.8541	10.695	18654	135.833	55.2417	404.379	13.4225	15.2596	159.649	1.96595	1.53538	43.4032	4.83372	5.90007
F1-10	67.5	49.028	10.0883	18686	163.461	61.0141	441.449	15.3664	16.4078	170.589	2.27765	2.0617	54.7566	6.01729	6.12211
F1-11	67.5	49.931	10.5732	18683	126.285	53.301	392.834	12.6679	14.988	156.826	1.87374	1.37798	38.698	4.59821	5.90215
F1-12	66.9	50.8025	11.1563	18732	151.952	58.6997	428.316	14.483	15.9456	166.731	2.17028	1.78975	49.8622	5.55742	6.04893
F1-13	59	50.382	11.37	19519.5	114.322	50.9739	378.248	12.2588	14.7168	154.214	1.71669	1.08368	35.2027	4.09498	5.84585
F1-14	56.2	49.4633	10.8071	19818	101.624	47.8182	361.432	11.4265	14.2536	149.818	1.54806	0.880563	30.6699	E	5.78357
F1-15	81	48.4391	10.1739	17570	182.718	64.6073	464.876	16.7368	17.0137	176.758	2.50749	2.56177	63.4083	6.78026	6.29087
F1-16	111.2	48.2058	10.7912	15577	227.164	73.2525	522.635	19.8177	18.8748	197.028	2.99432	3.69229	82.2823	8.11473	6.68466
F1-17	170.9	48.428	10.1286	12962	240.137	76.1815	534.191	20.5708	19.7421	203.571	3.1514	4.13324	E	8.2427	6.83081
F1-18	269.6	48.0796	10.4437	10048.5	238.366	74.9512	530.751	21.0949	19.925	206.685	3.12627	4.11043	E	8.13931	6.85328
F2-0	149.6	26.4923	10.1465	13606	237.642	73.8941	537.264	20.5071	19.7169	206.28	3.17744	4.10328	85.5815	8.30765	6.81666
F2-1	97.4	48.2435	9.3078	16258.6	183.788	64.5018	463.302	16.7056	16.9721	177.684	2.51734	2.60101	63.6623	6.68826	6.17852
F2-2	76.4	49.083	8.9701	17770.9	107.628	48.5641	368.933	11.3861	14.2786	153.094	1.65248	1.0522	33.0691	3.81659	5.72021
F2-3	75.1	4.9768	8.85825	17863.2	110.931	49.578	371.895	11.7625	14.4827	153.529	1.66863	1.11256	34.5576	3.86141	5.75441
F2-4	69.95	50.9661	4.7969	18304.6	67.7404	39.2147	305.569	8.82798	13.021	138.533	1.17338	0.46922	18.6559	2.25573	5.43595
F2-5	69.95	51.9295	8.5464	18299	99.2914	47.0276	353.705	10.9714	14.2072	148.959	1.52905	0.913489	29.3651	3.4966	5.75514
F2-6	69.9	52.8879	8.4151	18287	121.109	52.4929	386.359	12.7288	14.9129	157.056	1.813	1.23437	38.2413	4.26127	5.83005
F2-7	89.3	53.3558	8.8857	16763.6	192.056	64.2356	473.977	17.1837	17.4458	181.527	2.62368	2.82487	67.1241	6.84214	6.36172
F2-8	123	29.2802	5.50445	14691.6	225.23	73.1835	512.884	20.1082	18.8607	195.165	2.94748	3.68434	80.2016	8.02258	6.64231
F2-9	85.1	53.3257	11.2752	17034.5	183.312	64.9895	466.074	17.1021	17.1425	177.365	2.52944	2.60512	63.7429	6.4798	6.26555
F2-10	66.75	52.4999	11.3453	18576.3	97.9038	47.3223	350.352	11.3769	14.1583	149.474	1.54627	0.889277	29.7527	3.4507	5.75739
F2-11	64.8	52.2578	10.2902	18767.7	81.909	43.1933	330.722	10.2096	13.5983	143.912	1.34581	0.661807	20.1401	2.85904	5.62869
F2-13	64.55	52.1874	7.6717	18788.5	64.0686	38.7176	302.527	8.87769	13.1331	138.988	1.13449	0.421844	17.245	2.08249	5.56373
F2-14	64.85	51.2746	7.6592	18776.5	58.6349	37.2921	295.233	8.3241	12.9338	136.574	1.06131	0.355526	15.5688	1.91246	5.55174
F2-15	60.15	50.3321	7.7991	19257.9	73.1394	40.9239	316.008	9.20123	13.3722	141.144	1.26887	0.561636	20.2607	2.50389	5.63882
F2-16	70.2	49.2696	8.2823	18398.5	105.208	48.0756	361.646	11.3442	14.4288	149.735	1.62624	1.03003	32.0447	3.66094	5.73846
F2-17	117.75	48.925	9.26305	15033.6	227.852	73.6883	517.07	20.97	19.0779	197.51	3.01771	3.72777	E	7.84358	6.68967
F2-18	257.5	48.4685	10.4577	9995.99	241.03	75.3315	533.91	21.2689	19.6085	205.29	3.13442	4.11311	87.4826	8.12723	6.84934
2010-01-01	(UEA)
U101	66.06	73.6894	20.4823	17667.5	68.2447	37.766	297.664	8.66074	E	139.418	1.13281	0.578871	E	2.24346	5.63361
U102	64.81	74.5879	20.4284	17743	69.8982	38.5374	301.796	8.91243	E	140.259	1.18141	0.609908	E	2.32629	5.64241
U103	64.85	75.4511	20.2189	17706	75.6393	40.2683	313.212	9.19851	E	142.799	1.2283	0.660924	E	2.49497	5.71067
U104	64.965	76.2392	20.1025	17658	64.9835	36.8032	292.785	8.37881	E	138.837	1.08439	0.549518	E	2.12318	5.60215
U105	57.355	72.3898	22.7711	18504	54.4806	34.0124	274.65	7.65246	E	134.174	0.968453	0.374642	E	1.76777	5.53349
U106	58.62	73.2969	23.0842	18340	58.1597	35.3632	281.314	7.9625	E	135.013	1.01271	0.42082	E	1.87446	5.61414
U107	61.125	74.1903	23.3888	18068	60.1532	35.9088	285.039	8.28722	E	135.849	1.05466	0.46726	E	1.99027	5.63553
U108	64.7	75.0545	23.3995	17717.5	74.9751	39.9618	310.432	9.29738	E	140.356	1.24385	0.660498	E	2.51004	5.75093
U109	64.815	75.8375	21.6167	17694	72.0025	39.1198	300.657	9.05897	E	138.713	1.18848	0.61024	E	2.37877	5.69593
U110	55.92	71.5056	22.4548	18666	57.2792	35.3844	279.777	8.18842	E	136.676	0.997962	0.397977	E	1.79796	5.61385
U111	54.765	70.6159	22.2006	18829	52.7347	34.1054	274.112	7.63925	E	134.853	0.944929	0.340636	E	1.59478	5.57966
U112	154.88	68.2128	20.8117	13001.5	213.425	69.862	497.44	18.0023	E	189.797	2.85295	3.39211	E	7.59235	6.5355
U113	87.365	68.9857	21.5972	16279.5	124.742	51.9903	383.925	12.6973	E	158.123	1.82067	1.49752	E	4.46184	5.9052
U114	59.23	69.7501	22.0136	18466.5	50.692	32.9627	266.556	7.42038	E	133.714	0.921374	0.350969	E	1.68253	5.54434
U125	60.54	72.26	27.544	18246	80.398	41.9988	325.256	9.93799	E	145.359	1.30472	0.677776	E	2.74499	5.74169
U128	120.985	68.7113	20.418	14334.5	178.845	63.2327	453.686	16.3994	E	174.974	2.46514	2.56905	E	6.27133	6.19042
U129	60.805	74.0635	27.8847	18146	55.816	34.6917	275.964	7.83718	E	134.621	0.967525	0.408194	E	1.81821	5.50908
U130	70.85	72.5332	25.868	17334	105.12	47.536	359.55	11.3552	E	152.947	1.57429	1.10445	E	3.53493	5.83928
U131	74.645	70.3077	22.0412	17096	91.6622	43.3445	339.232	10.2423	E	149.404	1.45155	0.91742	E	3.08485	5.81887
U132	61.59	73.3252	27.2456	18091.5	60.8588	36.0124	284.489	7.95855	E	136.591	1.04203	0.456972	E	1.89424	5.52756
U133	283.565	67.7166	20.4977	9271.5	241.245	75.3313	527.318	21.7678	E	209.61	3.14736	4.08269	E	8.00546	6.9472
U134	99.6	70.9843	23.0553	15452.5	146.336	57.1133	423.567	14.1306	E	167.76	2.08361	1.89863	E	5.01969	6.116
U135	57.015	68.6833	23.3129	18637	46.2674	31.6556	263.27	6.83944	E	134.982	0.825469	0.284918	E	1.40409	5.60052
U136	56.535	67.8247	22.6543	18714.5	43.1316	30.5877	248.438	6.75582	E	129.167	0.80928	0.270817	E	1.38095	5.50621
U137	91.405	71.7803	24.4414	15919	143.616	56.0804	410.618	14.0404	E	164.41	2.03255	1.83791	E	5.06854	6.08556
U139	58.13	71.1133	26.1329	18469.5	53.364	33.8604	270.972	7.66201	E	133.286	0.929741	0.36068	E	1.70976	5.52548
U140	118.425	67.0358	20.7526	14512.5	177.8	63.5389	455.298	16.3408	E	176.992	2.45088	2.5326	E	6.33227	6.25935
U141	60.825	73.6482	27.6222	18159.5	57.3473	34.3943	278.497	7.84752	E	134.868	1.01201	0.418957	E	1.9167	5.59656
U142	55.825	66.9675	22.0323	18814	39.6811	29.3292	239.415	6.46736	E	127.778	0.762843	0.226606	E	1.20468	5.42607
U143	59.62	72.736	28.0994	18279.5	52.7354	32.7531	266.95	7.39756	E	133.346	0.950133	0.393562	E	1.76072	5.55528
U144	58.935	71.9038	27.3354	18373	51.9816	31.9968	268.275	7.10468	E	133.153	0.933975	0.363095	E	1.69323	5.54583
U145	57.79	69.4973	24.2299	18549	49.5454	32.5461	265.472	7.2058	E	133.628	0.866311	0.32444	E	1.47891	5.57129
U149	72.46	66.5152	21.212	17428.5	75.8291	39.8497	312.204	9.35997	E	143.262	1.24454	0.690221	E	2.57214	5.66309
U150	63.825	67.0927	4.6843	17733.5	53.6777	34.1242	279.47	7.46708	E	136.047	0.967817	0.340777	E	1.55392	5.61134
U153	57.79	70.3051	25.1675	18519.5	52.6823	33.7494	273.032	7.54883	E	134.151	0.954026	0.359066	E	1.6892	5.59263
U155	62.315	66.2712	10.8761	18203	68.3436	39.179	309.443	9.0969	E	143.043	1.15233	0.477861	E	2.1391	5.6681
U160	128.715	67.2422	18.9269	13547	179.773	62.8864	460.62	16.4921	E	177.33	2.45913	2.55704	E	6.20423	6.28975
U170	59.595	67.7476	16.1053	18352.5	49.6023	34.0905	270.956	7.63397	E	134.206	0.915452	0.258069	E	1.45787	5.50878
U173	60.035	71.9005	27.6947	18306.5	80.1804	41.9156	320.309	9.80994	E	143.402	1.32917	0.664347	E	2.70027	5.70785
U174	215.33	67.9003	20.2826	10951.5	225.243	72.5917	522.301	19.7266	E	199.893	3.03005	3.80122	E	7.69841	6.69889
U176	68.95	67.6669	16.1593	17299.5	53.0182	33.3735	268.612	7.39631	E	134.143	0.922598	0.365904	E	1.615	5.55047
U177	63.9	66.8716	12.6139	17684	50.0516	32.9741	270.162	7.32569	E	134.802	0.932769	0.324164	E	1.55784	5.52676
U178	61.075	72.6231	27.8913	18200	74.904	40.5671	310.456	9.38299	E	140.622	1.25142	0.583162	E	2.46355	5.63034
U179	55.265	69.6321	23.1071	18817.5	71.4898	39.063	305.611	9.12201	E	142.015	1.18842	0.554702	E	2.24394	5.62544
U180	108.285	68.1856	20.8901	14979	167.665	61.2193	440.78	15.6204	E	170.572	2.33521	2.32817	E	5.7783	6.18497
U182	71.215	68.8504	21.834	17450	101.253	46.4926	348.205	11.064	E	151.114	1.55115	1.01878	E	3.22246	5.7676
U183	106.465	67.737	18.054	14729.5	140.368	54.9252	402.314	13.839	E	161.261	2.03526	1.7644	E	4.93706	6.02557
U184	59.535	67.1276	14.5335	18091.5	41.0569	29.5738	244.928	6.38792	E	130.909	0.802617	0.235756	E	1.2676	5.54959
U226	64.06	67.0009	-0.72785	17767.5	38.7189	28.8193	237.165	6.17083	E	126.918	0.751531	0.240948	E	1.18279	5.43916
U236	123.525	68.5825	20.3602	14209.5	194.694	66.3788	477.208	17.8543	E	182.472	2.64934	2.90529	E	6.82146	6.41054
U237	81.445	69.4872	20.6782	16610.5	106.104	47.1618	357.079	11.5455	E	153.552	1.60493	1.17035	E	3.51591	5.84333
U238	78.59	70.3438	20.8286	16787	111.776	50.1161	366.896	12.4047	E	155.523	1.70548	1.28135	E	3.85955	5.91952
U239	87.53	71.1736	20.7408	16169.5	116.589	49.9477	374.233	12.1439	E	155.39	1.73634	1.32463	E	3.91497	5.89007
U240	123.235	71.9915	20.6604	14156	203.506	68.7281	485.89	18.1187	E	186.41	2.73828	3.19376	E	7.44185	6.46123
U241	82.015	72.8127	20.59	16496	133.576	54.1316	396.337	13.3161	E	161.762	1.92873	1.66282	E	4.73333	5.91981
U243	64.015	66.8147	3.5996	17735.5	55.1257	34.3902	273.496	7.56444	E	134.321	0.994426	0.363471	E	1.73037	5.49518
U246	63.93	67.1337	7.0803	17705.5	36.253	27.8816	237.579	6.0231	E	129.896	0.717138	0.225485	E	1.17355	5.53247
U249	63.595	66.8307	8.0865	17731.5	45.9217	31.6662	259.894	6.8125	E	132.367	0.833023	0.274976	E	1.3475	5.52725
U252	63.81	66.8409	1.31905	17766.5	37.4592	27.9982	237.777	6.13326	E	129.045	0.726339	0.231635	E	1.19336	5.57907
U253	63.805	67.1482	9.4765	17700	52.5817	33.8522	273.101	7.64055	E	134.507	0.920884	0.322188	E	1.771	5.55968
U254	63.53	66.8541	10.3545	17737.5	53.979	34.2292	280.148	7.52266	E	136.532	0.961753	0.328941	E	1.47999	5.53708
2010-01-01	(UFra)
U115	101.93	64.1077	5.6196	15365.5	176.753	63.6601	455.674	16.5936	E	177.509	2.47001	2.59628	E	6.35886	E
U116	58.775	70.6983	19.9423	18298.5	32.7677	26.8295	228.88	5.51063	E	125.176	0.71897	0.1822	E	1.1345	E
U117	79.355	67.3979	21.3973	16631	81.8416	41.6607	324.238	9.09746	E	144.459	1.2707	0.771272	E	2.77596	E
U118	115.8	68.9981	20.4481	14604.5	178.997	63.7013	461.047	16.451	E	176.759	2.50364	2.49384	E	6.99696	E
U119	60.82	72.2711	22.4187	18252	74.884	41.3597	315.318	9.41322	E	142.852	1.23559	0.592566	E	2.67227	E
U120	78.88	69.7504	20.9206	16795.5	132.287	53.1546	396.656	12.9296	E	159.019	1.79354	1.56359	E	4.98336	E
U121	56.21	71.1604	25.8915	18677.5	72.5446	40.0406	310.548	9.34393	E	140.022	1.25354	0.572855	E	2.39198	E
U122	61.34	71.45	21.9246	18209.5	83.8187	42.9279	327.981	9.89807	E	145.721	1.27898	0.731196	E	3.16289	E
U124	66.015	70.6135	21.5084	17805.5	92.874	45.2979	341.383	10.4591	E	147.224	1.52783	0.893426	E	3.36775	E
U126	60.795	74.2423	27.0264	18226.5	72.0127	39.3463	309.966	9.22744	E	140.187	1.34065	0.576259	E	2.55931	E
U127	60.96	73.0734	23.1319	18229	75.4032	40.6404	315.669	9.62508	E	142.158	1.33983	0.620898	E	2.64321	E
U138	60.91	72.6219	28.3444	18203	80.0354	42.3213	326.166	9.74913	E	142.106	1.35035	0.736231	E	2.71437	E
U146	82.415	65.0365	9.1887	16573.5	120.469	51.1084	381.822	12.8244	E	157.243	1.80327	1.30776	E	4.11864	E
U148	75.89	67.0033	19.4597	16906.5	71.4535	39.072	307.128	8.51721	E	139.983	1.26665	0.589035	E	2.70108	E
U151	61.505	66.7818	12.5437	18244	50.4923	34.905	280.251	7.37278	E	133.881	0.962319	0.296575	E	1.77904	E
U152	63.57	67.0334	2.3259	17767.5	E	35.0643	277.016	8.1256	E	134.548	0.976119	0.379484	E	2.00635	E
U156	84.115	64.5511	7.3167	16485	138.452	55.3474	406.543	13.5201	E	163.569	2.00109	1.70175	E	5.05414	E
U157	124.13	67.0973	22.0379	13941.5	168.08	61.5676	447.537	14.8768	E	172.927	2.36214	2.39543	E	5.78115	E
U158	64.3	67.0508	14.2062	17619	E	33.394	267.222	7.38789	E	131.997	1.04663	0.367353	E	1.86676	E
U159	76.765	66.6642	17.3044	16859.5	121.027	51.0627	379.765	11.8508	E	156.354	1.88337	1.45262	E	4.3707	E
U161	78.11	66.3007	15.1845	16782	121.286	51.1648	385.338	12.0818	E	157.176	1.88895	1.42358	E	4.33867	E
U162	62.885	65.744	9.25725	18189.5	94.1086	46.9199	352.065	10.9209	E	149.747	1.61873	0.82471	E	3.2804	E
U163	81.025	65.4655	11.1063	16630.5	140.814	56.9277	411.241	14.1679	E	163.715	2.04907	1.76646	E	5.17424	E
U164	66.46	64.6388	6.1242	17936	128.573	54.087	397.304	12.5495	E	159.146	1.9169	1.49318	E	4.58408	E
U165	69.14	66.6513	16.0711	17199.5	E	36.9895	292.517	8.14272	E	136.975	1.17141	0.500867	E	2.08765	E
U166	82.775	66.5203	17.7394	16168.5	E	46.6501	351.205	11.1194	E	150.281	1.55968	1.09256	E	3.52684	E
U167	63.505	65.1822	7.69645	18181.5	102.878	47.7267	361.707	11.6308	E	151.331	1.71755	1.04583	E	3.66168	E
U168	63.665	67.1019	11.8991	17691.5	E	35.4869	280.197	7.90403	E	135.312	1.035	0.396985	E	1.94442	E
U169	79.555	65.9062	13.146	16708	145.462	58.4015	417.774	14.3506	E	165.078	2.2019	1.81545	E	5.40457	E
U171	61.18	67.273	14.2866	18227	51.1083	34.7961	282.708	7.42181	E	136.546	1.00279	0.250777	E	1.62676	E
U172	92.195	64.0123	4.5492	15996	144.429	56.3066	413.979	14.1753	E	166.356	2.05757	1.87571	E	5.48248	E
U175	114.44	68.9859	21.0112	14822	135.555	54.2198	401.343	13.7992	E	161.002	2.04424	1.75559	E	4.73466	E
U181	60.765	73.7595	24.8777	18240	77.6203	41.4315	319.633	9.50227	E	141.517	1.34648	0.648877	E	2.69921	E
U216	73.4	65.3635	19.8416	16970	63.5545	37.2773	290.808	8.00149	E	136.495	1.13992	0.516224	E	1.85932	E
U224	60.715	73.5691	27.7533	18227	78.1026	41.5781	322.357	9.79094	E	142.336	1.33137	0.64321	E	2.62848	E
U225	55.215	70.4008	24.4042	18791.5	63.5048	37.8287	296.872	8.68424	E	138.262	1.12346	0.467416	E	2.3574	E
U227	63.175	65.9164	19.1231	17851.5	50.7213	33.4165	267.958	7.05388	E	132.606	0.974046	0.364316	E	1.49736	E
U228	79.56	72.9481	22.2747	17135	145.79	58.3798	424.336	14.6546	E	168.02	2.18588	1.86789	E	5.4901	E
U229	62.115	67.3143	22.0491	17966.5	46.4801	31.521	259.88	6.69042	E	131.377	0.922583	0.317315	E	1.49517	E
U230	62.035	68.8663	21.1065	17981	47.6253	32.1137	263.133	6.86959	E	132.377	0.926928	0.339922	E	1.47885	E
U231	225.99	67.9869	20.3976	10512.5	232.07	73.6953	521.611	20.5132	E	199.616	2.99555	3.97659	E	8.11409	E
U232	62.985	66.5694	20.7627	17880	59.5856	36.282	287.292	8.59988	E	136.238	1.11182	0.39303	E	1.81983	E
U233	58.855	70.2048	20.4046	18283.5	35.9437	28.0035	236.226	6.05451	E	127.771	0.758971	0.246788	E	1.30823	E
U234	125.775	67.0063	20.23	13810	172.1	62.219	448.963	15.116	E	172.902	2.51234	2.41329	E	5.87478	E
U235	61.19	69.9411	18.6863	18060	48.0133	32.1496	265.534	7.15153	E	132.641	0.936336	0.366312	E	1.56214	E
U244	61.255	68.2142	22.5782	18061	35.6897	28.0035	236.511	5.99668	E	127.599	0.730938	0.212615	E	1.30983	E
U245	70.67	69.3178	20.4111	17274.5	65.0031	37.4156	294.843	8.07143	E	136.351	1.13489	0.515559	E	2.53459	E
U248	61.85	69.2098	18.7333	18000	58.0054	36.0684	286.304	7.88284	E	136.459	1.06411	0.417767	E	1.60586	E
U250	61.465	65.0641	18.319	18000	39.1336	29.6216	245.007	6.18038	E	128.863	0.733762	0.211332	E	1.34996	E
U251	66.445	63.6612	18.9173	17532.5	55.2482	35.3976	280.557	7.67809	E	134.949	1.03058	0.376526	E	1.86918	E
U255	84.8	66.2002	20.3121	16139.5	100.619	46.534	349.918	11.0426	E	148.956	1.63036	1.07196	E	3.43389	E
U256	102.705	68.5945	20.5334	15056	135.214	54.3262	400.416	13.1453	E	160.585	1.99635	1.68091	E	4.76386	E
U257	67.445	64.5268	19.3835	17453.5	42.8876	30.7633	251.875	6.46071	E	130.679	0.888522	0.29158	E	1.36914	E
U258	65.96	63.2253	18.3501	17585.5	59.1162	36.3913	287.467	7.70566	E	136.663	1.03871	0.44631	E	1.97631	E
U259	69.75	81.8947	26.1027	17682	8.26506	13.9229	138.304	2.44771	E	108.545	0.223107	E	E	E	E
U260	71.95	79.43	25.6359	17603	66.691	39.6364	305.928	8.84426	E	141.214	1.22018	0.507708	E	2.17304	E
U261	76.89	78.4929	24.9172	17197	80.0113	42.9795	331.735	9.5954	E	147.356	1.41854	0.722535	E	2.82611	E
U266	81.9	70.0922	21.4474	17020	76.6778	40.9849	323.168	9.47041	E	144.944	1.33545	0.678169	E	2.1782	E
U267	77.94	75.7363	23.2804	17210	73.0224	38.8597	304.326	9.38917	E	142.05	1.22699	0.576893	E	2.5175	E
U268	77.44	76.6396	23.7462	17219	103.004	48.4502	359.944	11.4246	E	153.653	1.68113	1.09934	E	3.45749	E
U272	78.81	74.8033	22.8498	17145	72.0695	40.1809	314.808	9.6491	E	142.556	1.24895	0.610712	E	2.0534	E
U273	79.01	73.8393	22.5424	17174	149.381	58.0942	424.398	15.0274	E	168.493	2.16357	1.87902	E	E	E
U274	69.34	81.276	28.9217	17728	6.10636	11.8256	124.822	2.10715	E	108.595	0.193504	E	E	E	E
U275	177.21	79.2764	16.3278	11800	147.887	56.9323	416.472	14.6175	E	165.65	2.13441	2.07018	E	5.44984	E
U276	95.13	81.1417	22.8997	15737	40.6534	28.6474	241.383	6.33446	E	127.117	0.750463	0.271064	E	1.37311	E
U279	81.57	71.0249	21.7006	17011	87.8525	44.942	346.534	10.3849	E	150.239	1.50544	0.724418	E	2.89487	E
U280	81.39	71.9649	21.9202	17013	104.319	48.3904	373.311	11.7514	E	156.256	1.64498	0.989946	E	E	E
U281	77.14	77.569	24.2689	17213	86.1833	44.7393	338.777	10.3779	E	149.336	1.44066	0.764737	E	3.15662	E
U282	290.67	78.8447	15.2375	8612	215.562	70.913	503.977	19.382	E	191.737	2.89421	3.48095	E	7.67837	E
U283	124.99	80.0528	19.1593	14029	112.248	48.2241	364.427	11.8234	E	153.906	1.73086	1.32533	E	3.92829	E
U284	112.45	80.6271	21.1211	14687	107.922	47.9146	361.209	11.3163	E	150.887	1.68131	1.15695	E	3.98624	E
U285	70.52	80.2678	27.9211	17679	7.4063	13.644	135.314	2.59899	E	109.316	0.0887093	E	E	0.404457	E
2011-12-01
Kiruna-2011-U189	65.865	62.7174	17.6459	17983.5	133.425	53.0568	387.649	13.7416	E	170.476	2.03267	1.54693	43.4977	3.49764	E
Kiruna-2011-U190	64.47	67.2584	17.2001	17882.5	64.3198	34.3875	272.982	8.17998	E	142.232	1.1175	0.566524	18.9111	1.63678	E
Kiruna-2011-U194	75.285	64.9039	21.54	17046.5	114.539	48.7472	364.789	12.3918	E	164.585	1.77717	1.23129	36.8309	3.02466	E
Kiruna-2011-U200	64.455	65.4239	17.3993	17972.5	67.5977	36.2916	286.363	8.6282	E	147.509	1.19405	0.538288	19.3359	1.7246	E
Kiruna-2011-U202	122.065	66.8453	20.6482	14023	165.357	60.2724	438.505	15.8567	E	183.62	2.37872	2.23503	55.7893	4.33519	E
Kiruna-2011-U203	64.465	63.611	17.5402	18070.5	116.798	48.5739	367.021	12.2811	E	164.796	1.79372	1.27188	33.8894	3.00079	E
Kiruna-2011-U204	75.08	63.3084	19.7753	17153	125.707	51.3595	383.396	12.9144	E	167.262	1.92197	1.44895	41.7476	3.30412	E
Kiruna-2011-U207	81.075	65.8406	21.1847	16564	112.452	48.4354	362.09	12.2005	E	163.262	1.81282	1.22202	36.2791	3.11225	E
Kiruna-2011-U215	75.085	64.0179	21.1183	17099	96.1436	45.1507	329.968	11.1746	E	156.712	1.48737	0.884415	28.0376	2.43435	E
Kiruna-2011-U221	55.855	70.284	20.4703	18588.5	19.5415	18.9649	171.406	3.91669	E	123.971	0.457736	0.0800961	4.09357	0.45619	E
Kiruna-2011-U286	64.46	68.1764	17.1502	17844.5	56.5917	31.2954	250.717	7.22737	E	139.664	0.991753	0.454813	15.3482	1.38958	E
Kiruna-2011-U287	56.395	70.8941	16.6356	18523	25.1297	21.2945	186.244	4.68619	E	128.372	0.546171	0.117737	5.42106	0.59308	E
Kiruna-2011-U288	58.31	69.9958	16.8267	18370	55.1878	32.2803	260.507	7.51773	E	141.219	0.994785	0.4029	15.0903	1.35977	E
Kiruna-2011-U289	75.045	62.6204	18.541	17202	139.504	55.4364	399.226	14.4765	E	172.647	1.97743	1.67394	45.5949	3.61212	E
Kiruna-2011-U292	56.615	71.2316	20.5002	18466.5	13.6822	16.926	153.13	3.44972	E	120.758	0.357267	0.0381573	2.64081	0.320414	E
Kiruna-2011-U293	62.06	69.0963	17.0615	18034.5	47.0238	28.9401	236.316	6.49491	E	138.485	0.853052	0.359726	12.9613	1.11429	E
Kiruna-2011-U294	64.46	64.5125	17.4809	18013.5	92.3066	42.5166	329.239	10.2976	E	155.84	1.45336	0.871909	27.229	2.31985	E
Kiruna-2011-U295	64.48	66.3392	17.2615	17922	85.2855	40.9108	305.502	9.89837	E	150.913	1.36648	0.739178	23.8657	2.11389	E
Kiruna-2011-U298	55.57	71.4897	18.2978	18576	16.3829	18.0507	164.59	3.64595	E	122.023	0.429464	0.04943	3.35877	0.377912	E
Kiruna-2011-U299	89.11	69.4018	20.5656	15920	114.267	47.736	364.123	12.1088	E	165.903	1.73495	1.26289	36.6447	2.97615	E
Kiruna-2011-U160	63.7	70.3555	13.8459	17670	21.3882	19.7894	172.956	3.9474	E	123.666	0.484063	0.102508	4.92554	0.505583	E
Kiruna-2011-U161	64.03	68.4864	2.50545	17643	15.7021	17.4558	160.935	3.42967	E	118.936	0.425298	0.0555795	3.39668	0.43277	E
Kiruna-2011-U162	66.155	67.5173	2.40935	17449	63.3186	33.3666	264.114	7.96334	E	138.463	1.062	0.547824	18.7986	1.60297	E
Kiruna-2011-U164	63.75	69.4095	2.81605	17649	17.6042	18.3432	163.287	3.70728	E	122.077	0.44078	0.0583211	3.83341	0.376765	E
Kiruna-2011-U165	63.64	69.797	5.21315	17661	18.5432	18.2461	167.298	3.7578	E	123.428	0.447479	0.087096	4.15147	0.427525	E
Kiruna-2011-U168	63.725	70.4033	16.7946	17683.5	21.3514	20.0207	177.109	4.10766	E	124.209	0.476968	0.10266	4.97313	0.474705	E
Kiruna-2011-U171	63.685	70.2418	10.928	17661.5	18.6013	18.8761	168.269	4.01492	E	121.677	0.426105	0.0881746	4.0242	0.396293	E
Kiruna-2011-U172	74.48	67.0606	3.56925	16768.5	113.786	47.3377	361.243	12.0031	E	162.287	1.76771	1.18118	35.4729	2.88275	E
Kiruna-2011-U174	74.5	67.3031	5.85655	16771	92.3216	42.1232	324.746	10.4158	E	153.942	1.42173	0.905725	28.0174	2.39093	E
Kiruna-2011-U175	63.595	70.0456	8.05905	17669.5	17.8857	18.5676	165.746	3.732	E	121.701	0.444518	0.0638764	3.89629	0.42685	E
Kiruna-2011-U230	74.725	67.7284	13.0032	16779	70.2324	35.817	290.35	8.74583	E	147.539	1.14447	0.614857	21.013	1.81352	E
Kiruna-2011-U232	74.825	67.6292	10.5658	16759.5	73.124	36.2772	291.845	8.6838	E	148.166	1.21592	0.683464	21.8996	1.883	E
Kiruna-2011-U235	79.7	67.8162	15.2126	16397.5	86.9187	41.078	319.589	10.036	E	152.929	1.41755	0.803392	26.4831	2.27955	E
Kiruna-2011-U243	116.98	67.8371	17.2709	14171	190.326	65.2177	469.525	17.6341	E	190.802	2.60258	2.6866	68.2405	5.0703	E
Kiruna-2011-U248	74.785	67.4953	8.15575	16747.5	104.122	46.1813	345.185	11.1831	E	154.101	1.62882	1.09103	32.9482	2.69385	E
Kiruna-2011-U251	63.58	70.4095	19.7307	17701	15.9059	17.2427	158.73	3.5585	E	121.01	0.376335	0.0544296	3.21896	0.362016	E
Kiruna-2011-U256	257.9	68.7159	21.8136	9460.5	235.826	73.1977	526.687	22.3353	E	221.04	3.13417	3.96335	86.9962	5.65102	E
Kiruna-2011-U260	75.13	69.8804	23.7212	16824	48.5149	29.1803	233.181	6.4254	E	133.945	0.88377	0.381972	13.4493	1.10703	E
Kiruna-2011-U266	64.675	70.3633	22.7038	17633	18.9831	18.6962	166.28	3.86081	E	124.294	0.425747	0.0912949	4.24108	0.450048	E
